# Supplementary material for: CAMTA1 Transcription Factor Regulates Salinity And Drought Tolerance In Chickpea (Cicer arietinum L.)
Source: Research Square preprint supplement (doi:10.21203/rs.3.rs-840327/v1), 2021-09-03
Supplement: Supplementary file 1 [file f5e73b9ac0a720655f905ae4.docx]

**Fig.S2** *Agrobacterium*-mediated transformation of chickpea. **a** Germinated seed. **b** Axillary and shoot meristem arising from seeds. **c** Excised nodes on MS medium supplemented with L-cysteine (100 mg/l). **d** Regeneration from nodes on cefotaxime (500 mg/l) medium. **e** Shoots transferred to hygromycin (5 mg/l) selection. **f** Transfer of shoots to 2nd selection (10 mg/l). **g** Transfer of shoots to 3rd selection (15 mg/l). **h** Surviving shoots transferred to regeneration medium. **i** Grafted shoots on seedling stocks for hardening and acclimatization.
**j** Flower and pod setting.
